# Supplementary material for: A promising electrochemical sensing platform based on a silver nanoparticles decorated copolymer for sensitive nitrite determination
Source: Royal Society of Chemistry journal article supplement (doi:10.1039/c3ta13794e), 2013-10-30
Supplement: c3ta13794e.pdf [file c3ta13794e.pdf]

## Electronic Supplementary Information

### **A promising electrochemical sensing platform based on a silver nanoparticles decorated copolymer for sensitive nitrite determination**

Pankaj Kumar Rastogi, Vellaichamy Ganesan\* and S. Krishnamoorthi

Department of Chemistry, Faculty of Science, Banaras Hindu University

Varanasi-221 005, UP, India

Telephone: + 91-542-2307321; Fax: + 91-542-2368127

E-mail: VG: [velganes@yaho.com](mailto:velganes@yaho.com) and [velgan@bhu.ac.in](mailto:velgan@bhu.ac.in)

\*Corresponding author

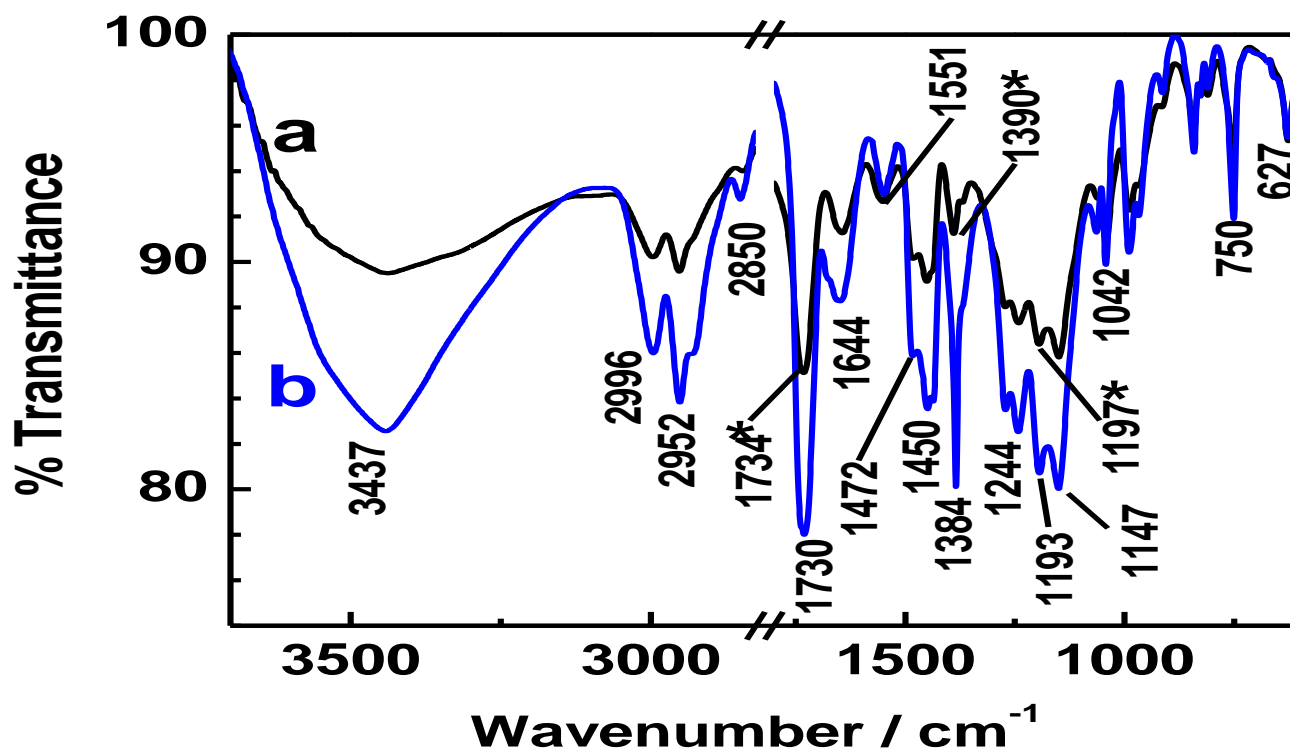

**Fig. S1** FTIR spectra of (a) P(MMA-*co*-AMPS) and (b) Ag/P(MMA-*co*-AMPS).

\* Represents changes in the peak positions

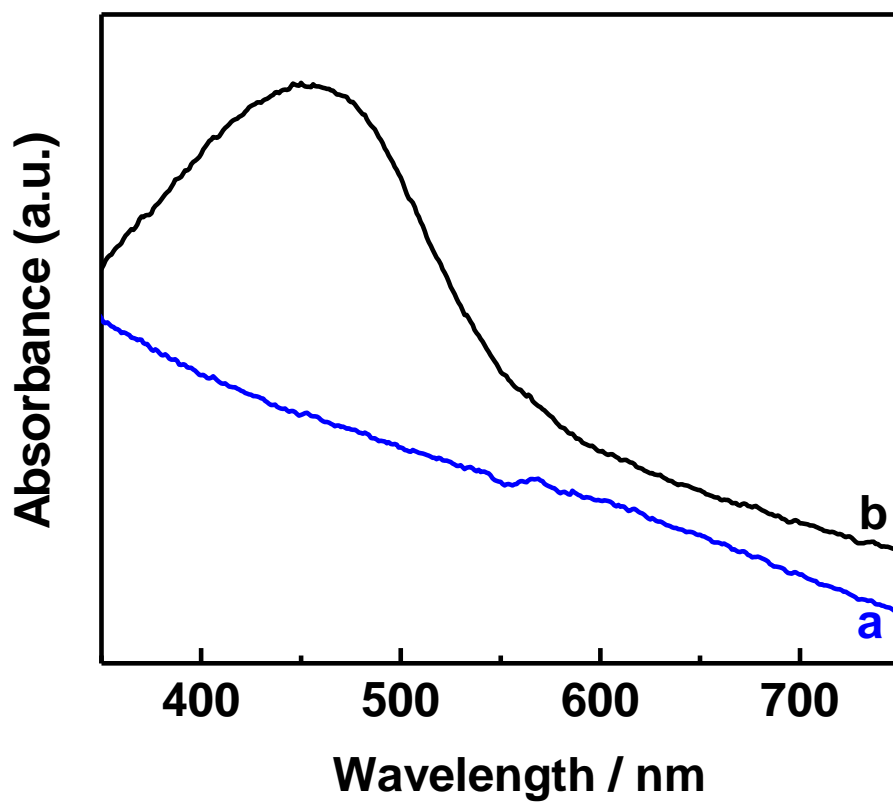

**Fig. S2** UV-visible spectra for (a) P(MMA-*co*-AMPS) and (b) Ag-P(MMA-*co*-AMPS) coated on glass plate.

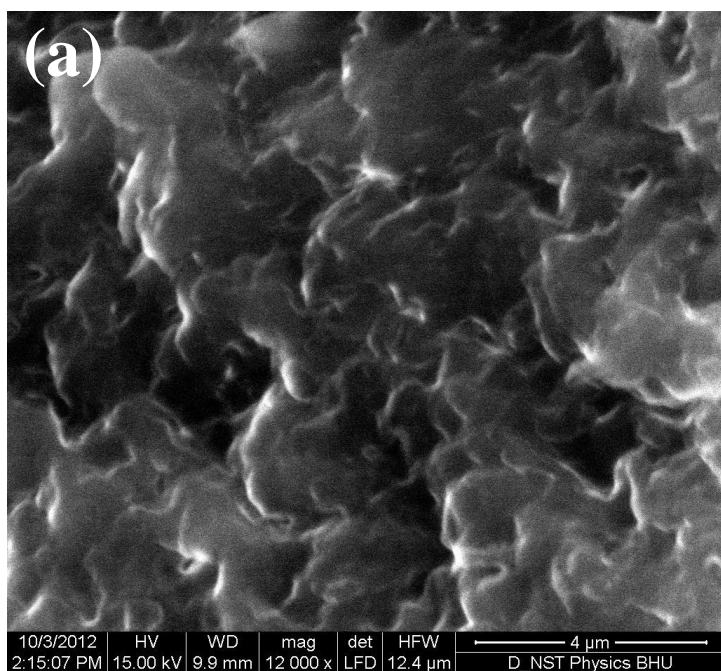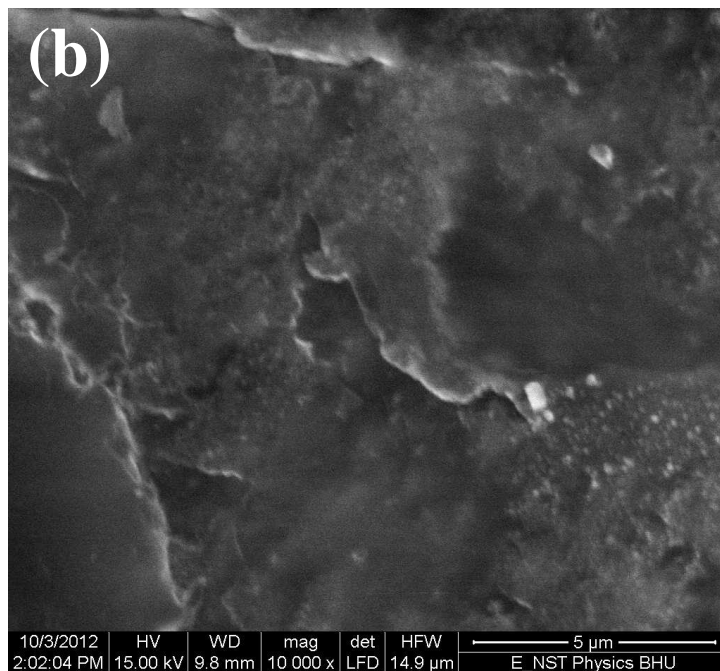

**Fig. S3** SEM images of powder (a) P(MMA-*co*-AMPS) and (b) Ag-P(MMA-*co*-AMPS) materials.

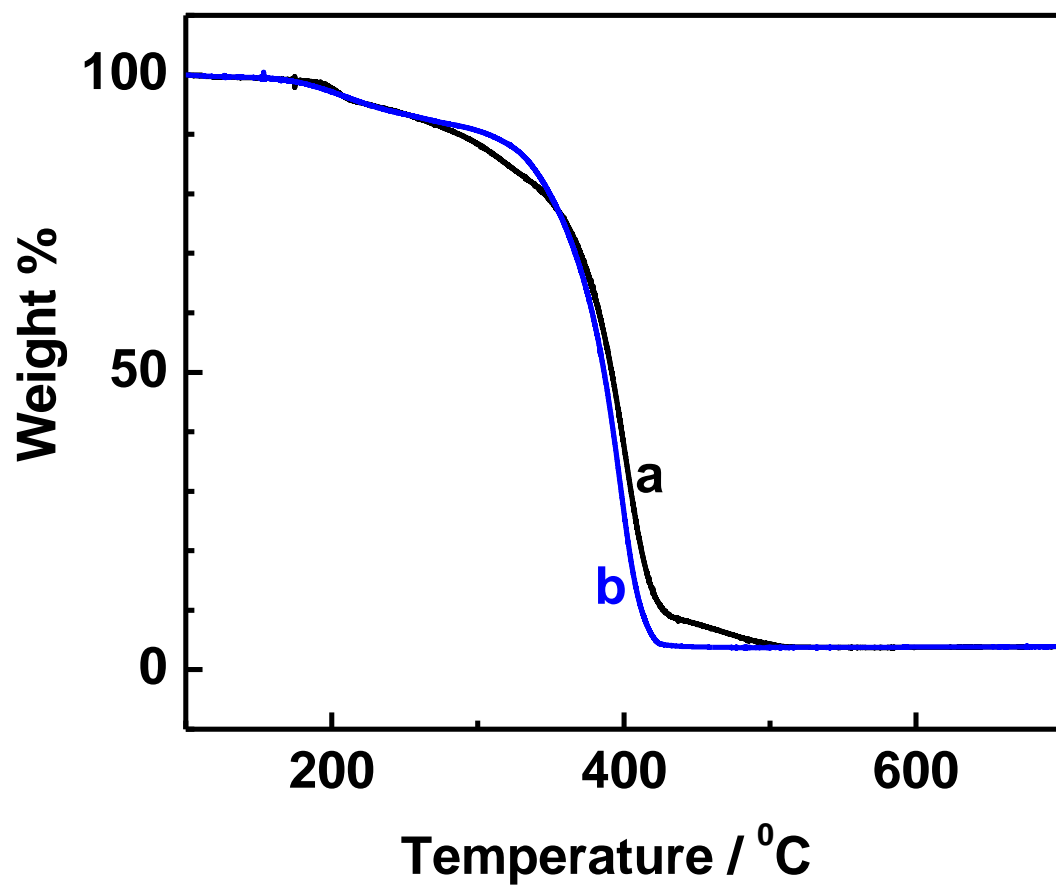

**Fig. S4** TGA curves of (a) P(MMA-co-AMPS) and (b) Ag-P(MMA-co-AMPS) materials.

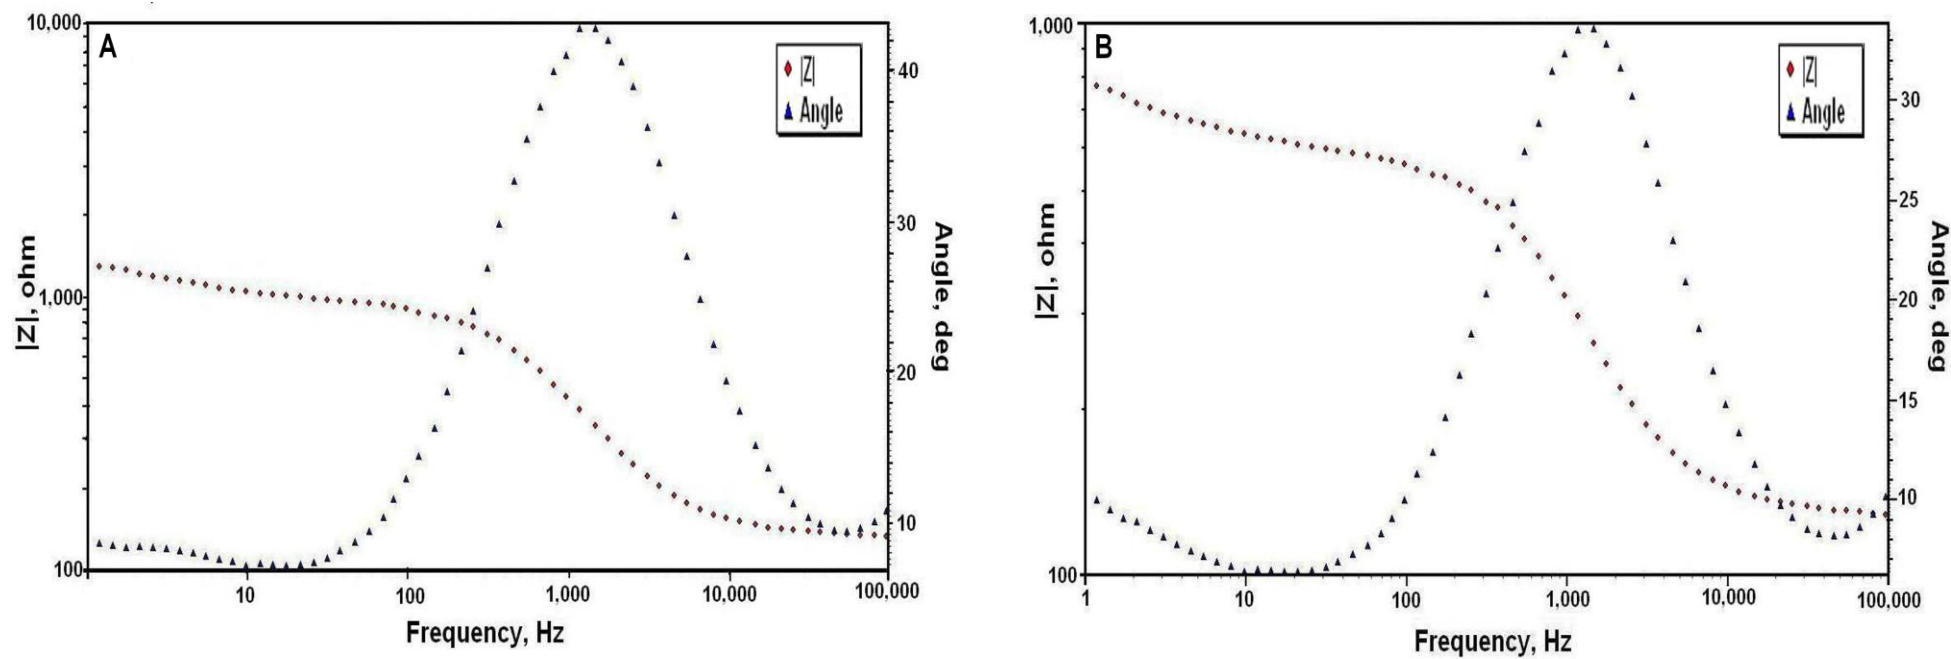

**Fig. S5** Bode-phase angle and Bode amplitude plots for (A) GC/P(MMA-*co*-AMPS) and (B) GC/Ag-P(MMA-*co*-AMPS) electrodes in 10.0 mM  $\text{Fe}(\text{CN})_6^{3-}/\text{Fe}(\text{CN})_6^{4-}$  (1:1 molar ratio) containing 0.1 M KCl solution.

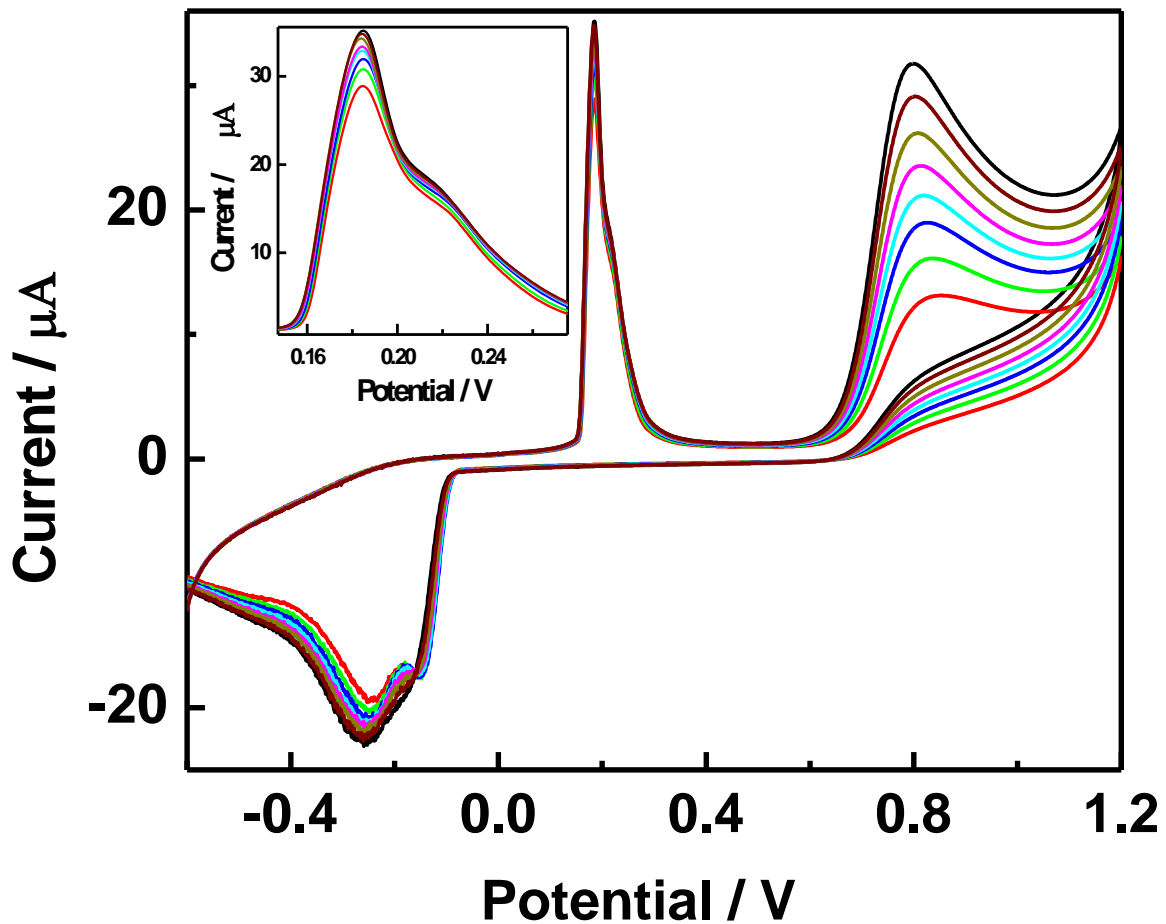

**Fig. S6** CVs of different concentrations of  $\text{NO}_2^-$  at the GC/Ag-P(MMA-co-AMPS) in 0.1 M PBS (pH 7.0) at scan rate  $20 \text{ mVs}^{-1}$ . Insert shows enlarged view of oxidation peaks.

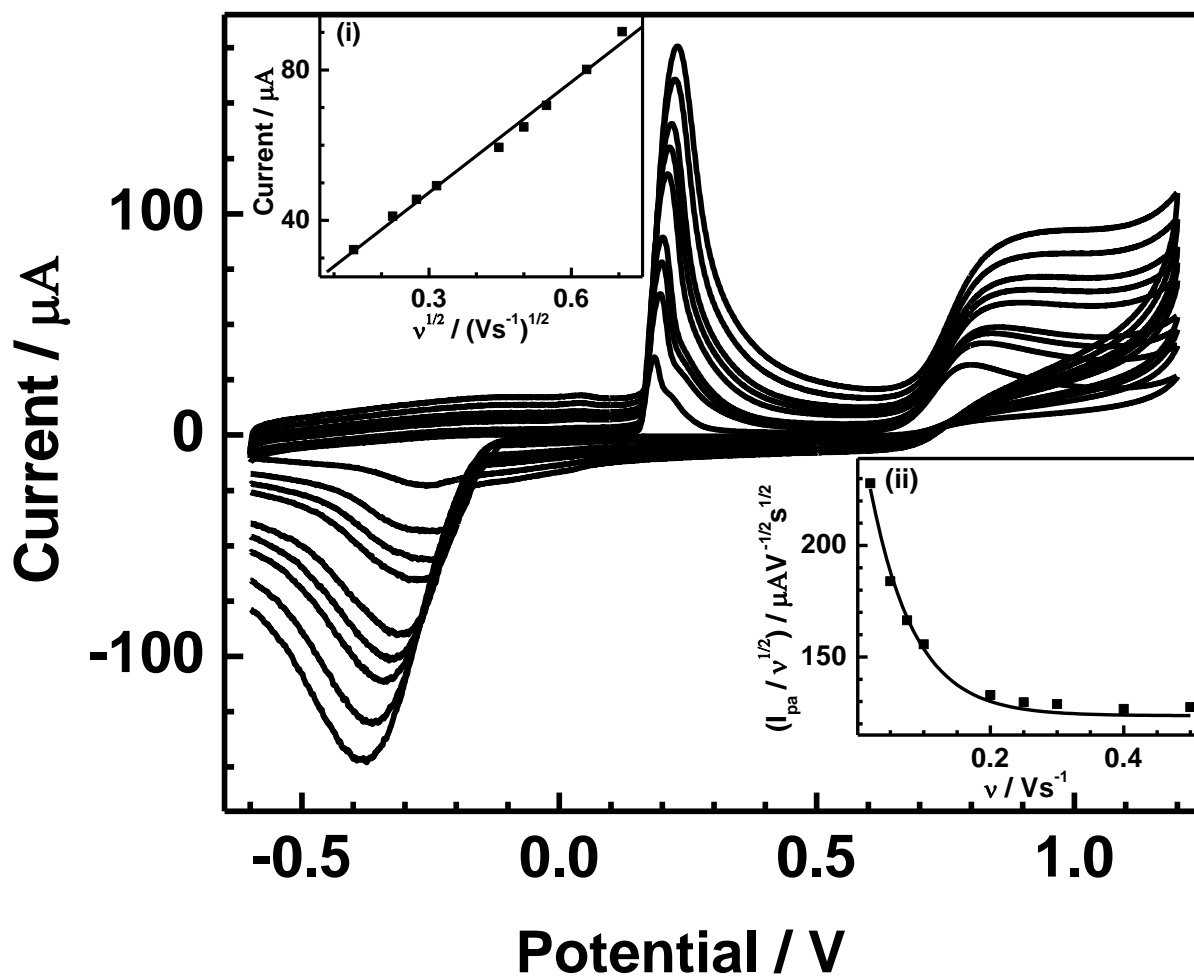

**Fig. S7** CVs recorded at GC/Ag-P(MMA-co-AMPS) electrode in the presence of 1.0 mM NO<sub>2</sub><sup>-</sup> at various scan rates (20, 50, 75, 100, 150, 200, 250, 300 and 400 mVs<sup>-1</sup>). Inset (i) shows plot of anodic peak currents vs. the square root of scan rate (v<sup>1/2</sup>) and inset (ii) shows plot of I<sub>pa</sub>/v<sup>1/2</sup> vs. v. Supporting electrolyte: 0.1 M PBS (pH 7.0).



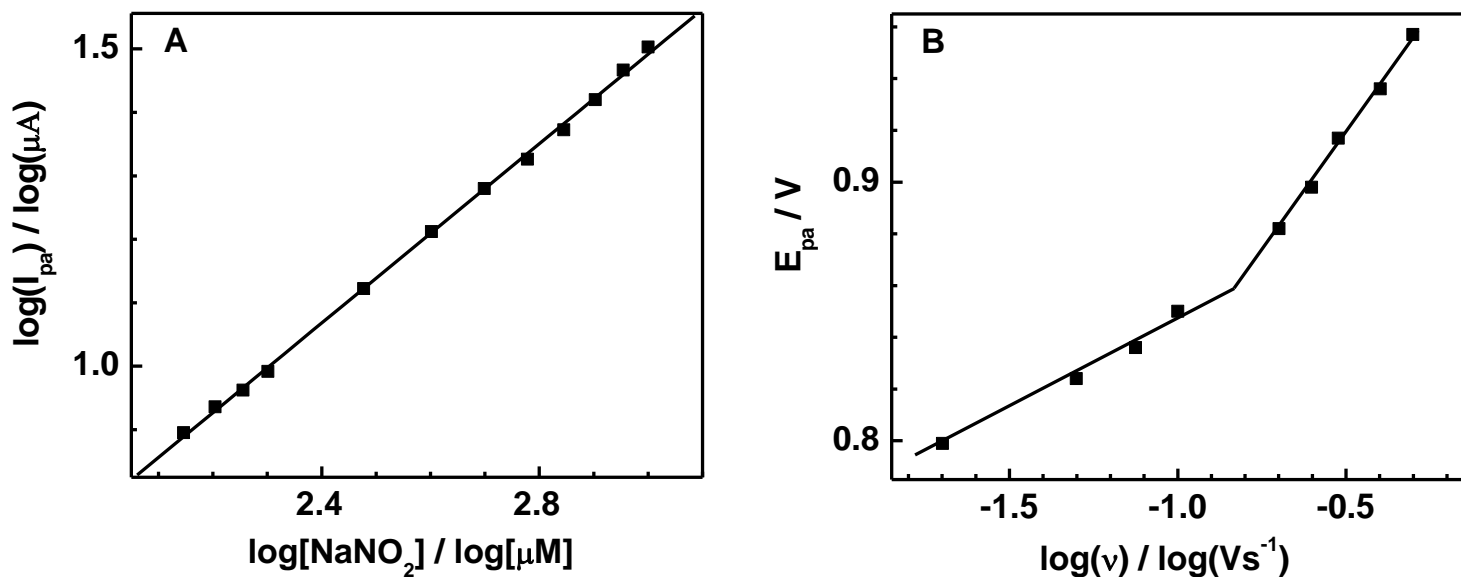

**Fig. S8** Plots of (A)  $\log(\text{catalytic current})$  vs.  $\log[NO_2^-]$  and (B)  $E_{pa}$  vs.  $\log v$  for GC/Ag-P(MMA-co-AMPS) electrode

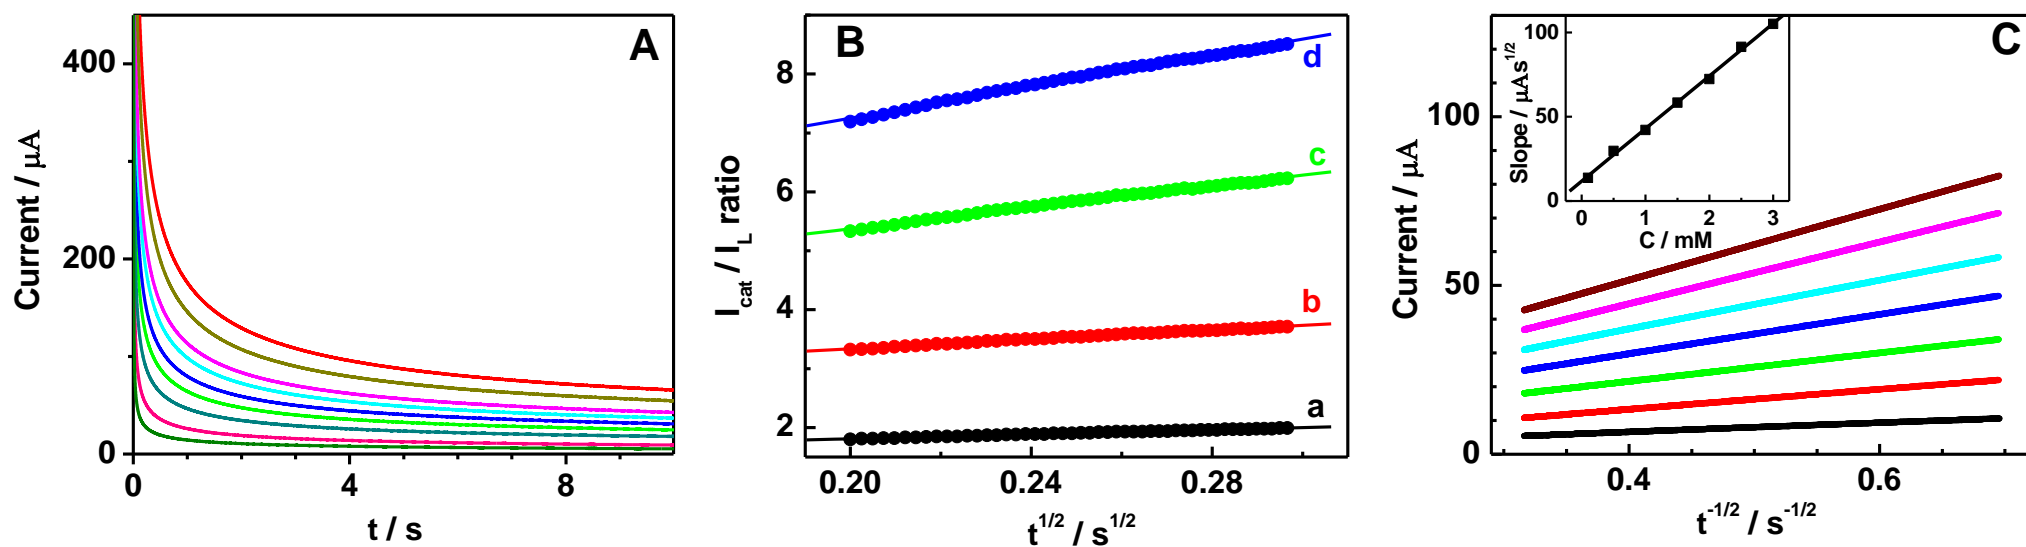

**Fig. S9** (A). Chronoamperograms of different concentrations of  $\text{NO}_2^-$  in 0.1 M PBS (pH 7.0) at GC/Ag-P(MMA-co-AMPS). (B). Plot of  $I_{\text{cat}}/I_L$  vs.  $t^{1/2}$  and (C). Plot of  $I$  vs.  $t^{-1/2}$  (inset shows slope of resulting straight lines vs. concentration of  $\text{NO}_2^-$  plot).

**Table S1** Impedance parameters at GC/P(MMA-*co*-AMPS) and GC/Ag-P(MMA-*co*-AMPS) electrodes

| Parameter                             | GC/P(MMA- <i>co</i> -AMPS) | GC/Ag-P(MMA- <i>co</i> -AMPS) |
|---------------------------------------|----------------------------|-------------------------------|
| $R_s$ ( $\Omega$ )                    | 130                        | 127                           |
| CPE                                   | $1.14 \times 10^{-6}$      | $1.92 \times 10^{-6}$         |
| $R_{ct}$ ( $\Omega$ )                 | 824                        | 454                           |
| $ Z $ at lower frequency ( $\Omega$ ) | 954                        | 581                           |
| Phase angle (degree)                  | 43                         | 33                            |
| $k_{et}$ ( $\text{cm s}^{-1}$ )       | $2.30 \times 10^{-4}$      | $4.19 \times 10^{-4}$         |
